# Supplementary material for: Radial extracorporeal shockwave promotes subchondral bone stem/progenitor cell self-renewal by activating YAP/TAZ and facilitates cartilage repair in vivo
Source: PubMed Central journal article supplement (PMC7792202; doi:10.1186/s13287-020-02076-w), 2021-01-07
Supplement: 13287_2020_2076_MOESM5_ESM.pdf [file 13287_2020_2076_MOESM5_ESM.pdf]

### 解放军总医院实验动物福利伦理审查批件

编号: 2019-X15-57

签署日期: 2019-04-13

|      |                    |      |             |
|------|--------------------|------|-------------|
| 申请题目 | 精准能量冲击波修复软骨损伤的实验研究 |      |             |
| 申请人  | 赵之栋                | 申请日期 | 2019-04-09  |
| 申请单位 | 中国人民解放军总医院         |      |             |
| 联系电话 | 18703416131        | 申请编号 | 2019-X15-57 |
| 审查意见 | 通过审查 ( ✓ )         |      |             |
|      | 修改后通过 (修改意见:)      |      |             |
|      | 未通过审查 (不同意理由:)     |      |             |

签字页

| 姓名  | 人员类别* | 签名 |
|-----|-------|----|
| 夏蕾  | 科研管理  |    |
| 何昆仑 | 科研管理  |    |
| 刘广东 | 科研管理  |    |
| 颜光涛 | 医学研究  |    |
| 翟所强 | 医学研究  |    |
| 崔俊昌 | 医学研究  |    |
| 郭明洲 | 医学研究  |    |
| 白雪源 | 医学研究  |    |
| 张爱群 | 医学研究  |    |
| 张余  | 公众代表  |    |
|     |       |    |
|     |       |    |
|     |       |    |
|     |       |    |

主任委员意见

签名:

日期:

2019. 4. 13
